# Supplementary material for: A mix-and-detect method based on colloidal gold immunochromatographic assay for on-site detection of zearalenone in edible oils
Source: Royal Society of Chemistry journal article supplement (doi:10.1039/d0ay01752c), 2020-01-01
Supplement: d0ay01752c5.pdf [file d0ay01752c5.pdf]

**Supplement information**

**A mix-and-detect method based on colloid gold  
immunochromatographic assay for on-site detection of  
zearalenone in edible oils**

Xinyi Mao<sup>a1</sup>, Yuxiang Wu<sup>b1</sup>, Huitian Chen<sup>a</sup>, Yifan Wang<sup>a</sup>, Binger Yu<sup>a</sup>, Guoqing  
Shi<sup>a\*</sup>

<sup>a</sup> School of Chemistry and Biological Engineering, University of Science and Technology Beijing,

Beijing, 100083, P.R.China, E-mail address: [shiguoqing@ustb.edu.cn](mailto:shiguoqing@ustb.edu.cn); tel: +86-10-62334497

<sup>b</sup> Shandong Lvdu Biotechnology Co., Ltd., Shandong, 256600, P.R.China.

<sup>1</sup> These authors contribute equally to the article.

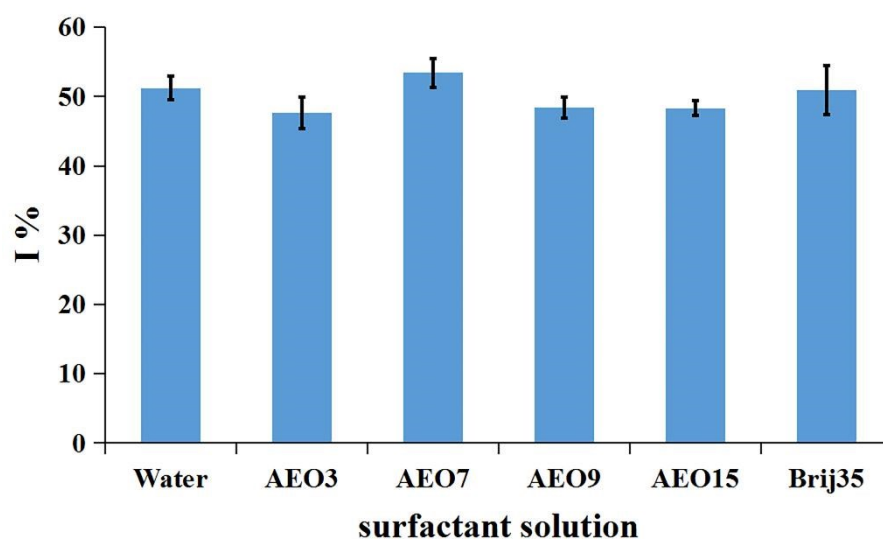

12

13 **Fig. S1** The effect of surfactant on I%. ZEN was added to water and 0.5% AEO  
 14 surfactant solution respectively to make the final concentration  $1 \text{ ng mL}^{-1}$ . Then, 80  
 15  $\mu\text{L}$  of ZEN-free and ZEN-containing water, ZEN-free and ZEN-containing surfactant  
 16 solutions were dropped to the test card. I% was calculated according to the method in  
 17 Section 2.5 of the paper.

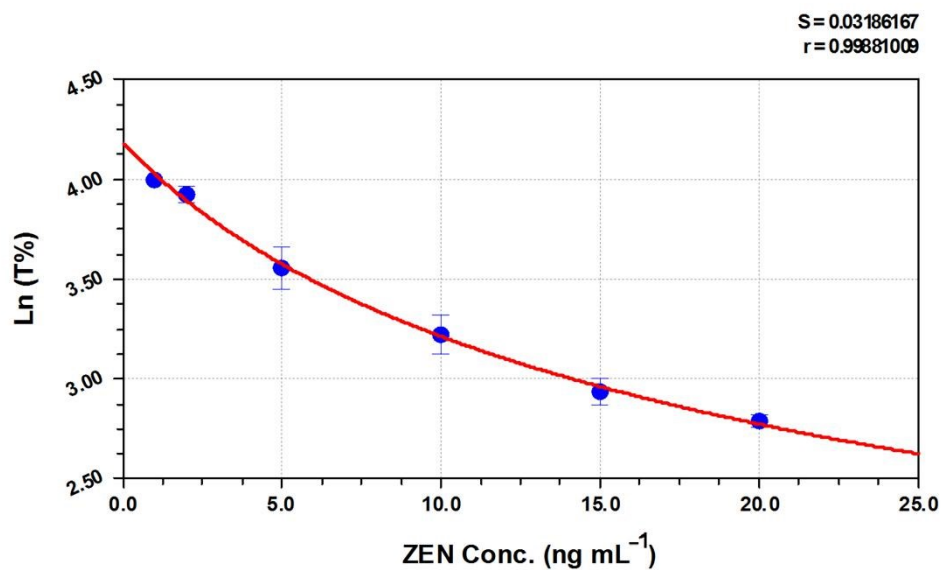

18

19 **Fig. S2** Standard curve for determination of ZEN in 2mg mL<sup>-1</sup> of AEO 15

20 solution. The standard curve was based on Bleasdale model and the curve equation is

21  $y = (a + bx)^{-1/C}$ , in which  $a = 0.0154$ ,  $b = 1.77 \times 10^{-3}$ ,  $C = 2.92$ ,  $x$  is the concentration of

22 ZEN in 2mg mL<sup>-1</sup> of AEO 15 solution,  $y$  is Ln(T%).

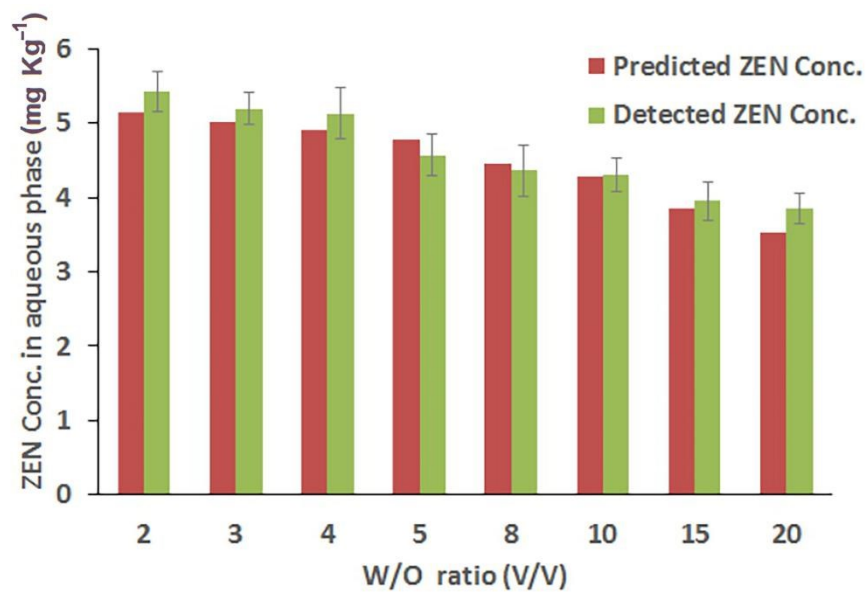

23

24 **Fig. S3** Predicted ZEN concentration by using calculated k value and detected ZEN

25 concentration by using the colloidal gold immunochromatographic strips in aqueous

26 phase at different W/O ratio.
