# Supplementary figures and images for: A mix-and-detect method based on colloidal gold immunochromatographic assay for on-site detection of zearalenone in edible oils
Source: Royal Society of Chemistry journal article supplement (doi:10.1039/d0ay01752c), 2020-01-01

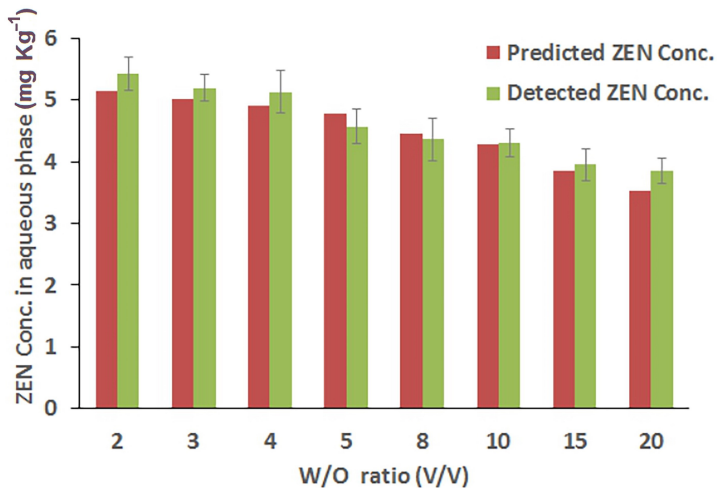

Supplement: d0ay01752c4.pdf [file d0ay01752c4.pdf]
